# Supplementary material for: Enhancing the cycling stability of Na-ion batteries by bonding SnS2ultrafine nanocrystals on amino-functionalized graphene hybrid nanosheets
Source: Royal Society of Chemistry journal article supplement (doi:10.1039/c5ee03262h), 2016-01-01
Supplement: c5ee03262h1.pdf [file c5ee03262h1.pdf]

## **Electronic Supplementary Information**

### **Enhancing the Cycle Stability of Na-Ion Batteries by Bonding SnS<sub>2</sub> Ultrafine Nanocrystals on Amino-Functionalized Graphene Hybrid Nanosheets**

Yong Jiang,<sup>a</sup> Min Wei,<sup>a</sup> Jinkui Feng,<sup>a</sup> Yuchen Ma,<sup>a</sup> and Shenglin Xiong<sup>\*,a,b</sup>

<sup>a</sup>Key Laboratory for Colloid and Interface Chemistry, Ministry of Education,  
and School of Chemistry and Chemical Engineering, Shandong University,  
Jinan 250100, P. R. China

<sup>b</sup>Institute of Physical Chemistry, Zhejiang Normal University, Jinhua 321004,  
P. R. China

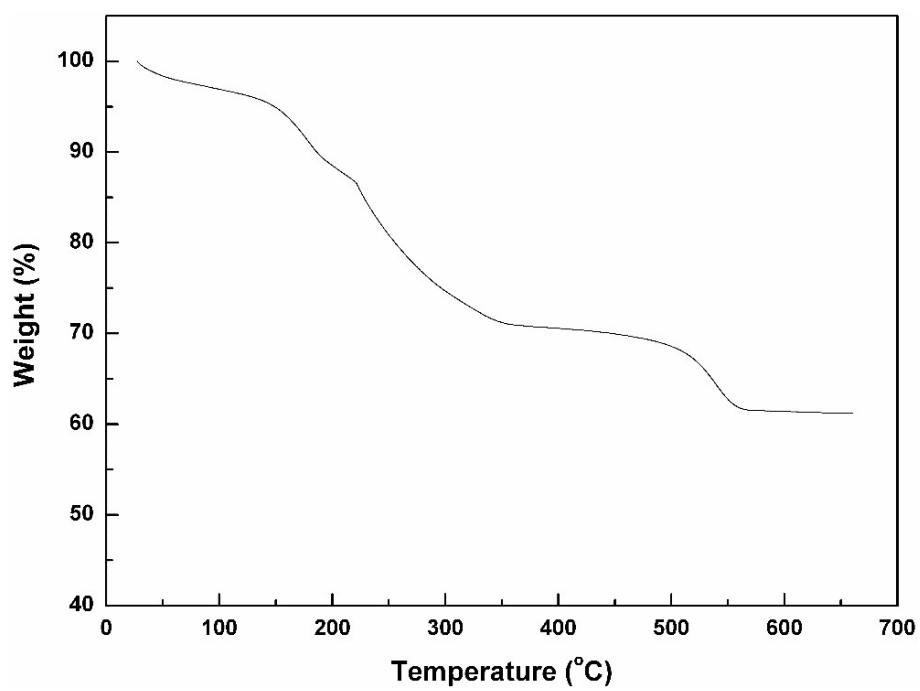

**Figure S1.** Thermogravimetric analysis of the as-synthesized SnS<sub>2</sub> NC/EDA-RGO hybrid nanosheets.

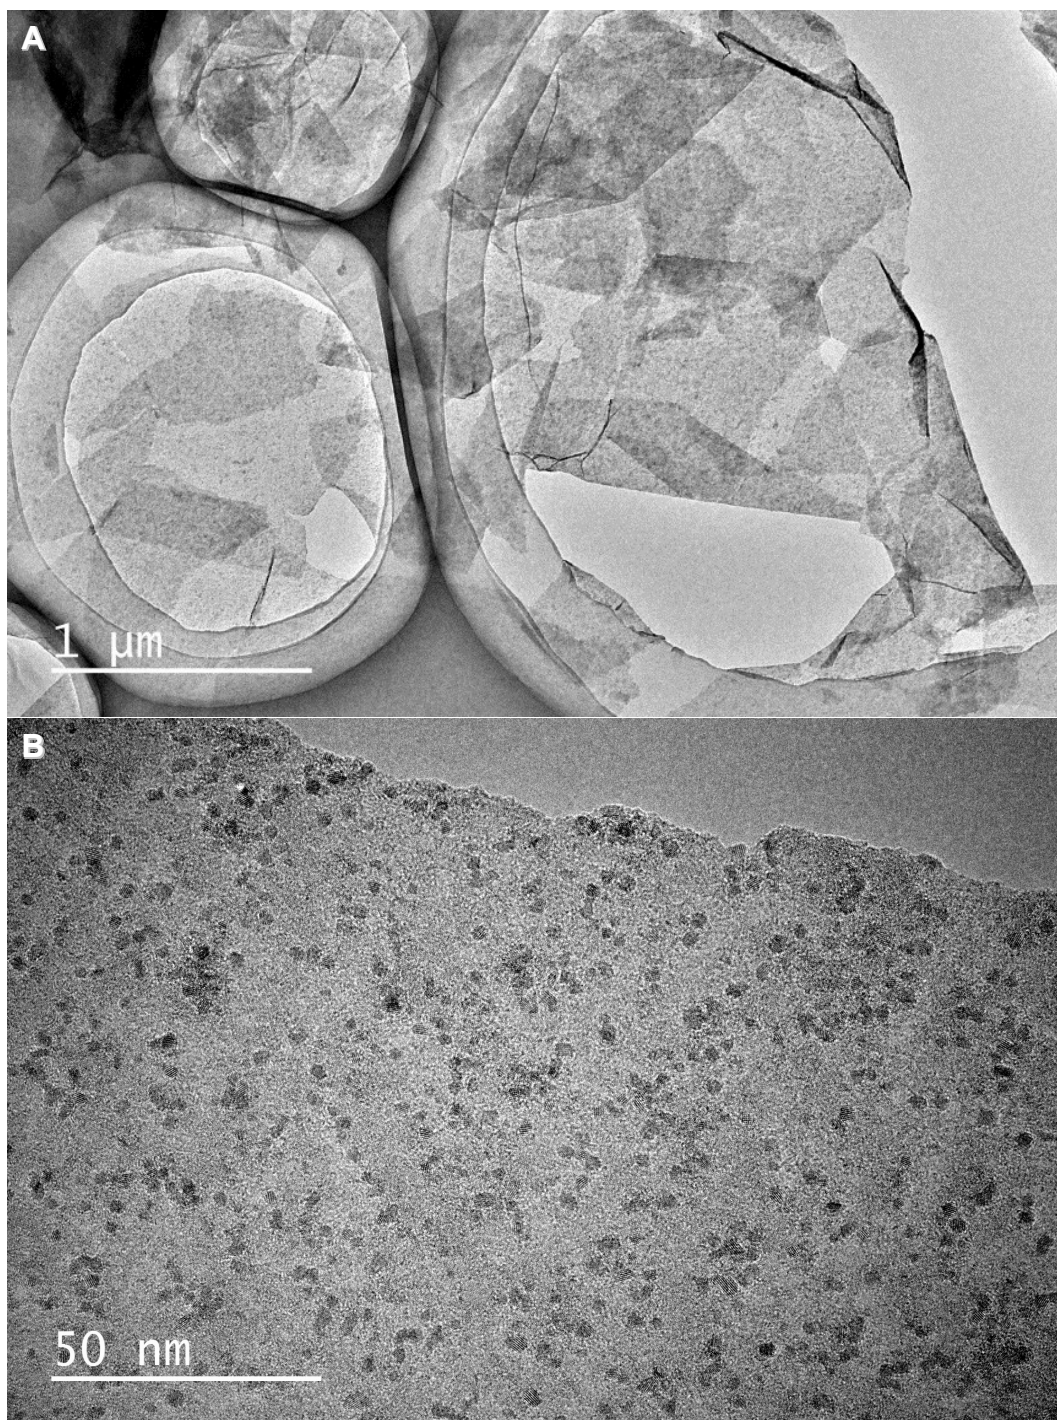

**Figure S2.** A,B) TEM (A) and high-magnification TEM (B) images of SnS<sub>2</sub> NC/EDA-RGO hybrid nanosheets.

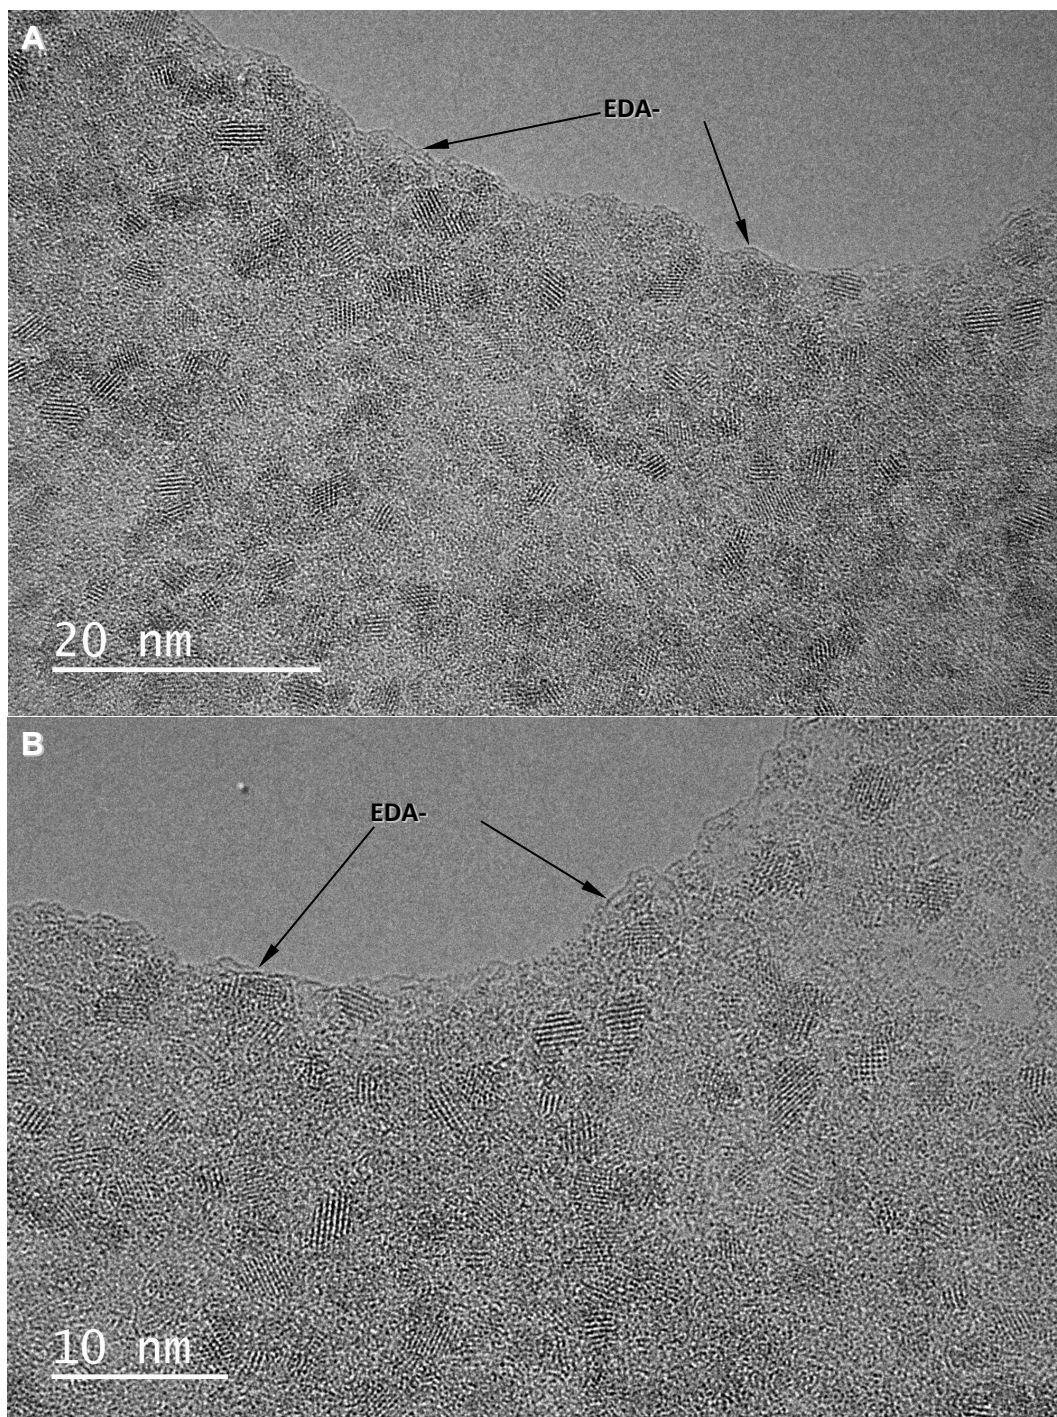

**Figure S3.** A,B) HRTEM images of SnS<sub>2</sub> NC/EDA-RGO hybrid nanosheets.

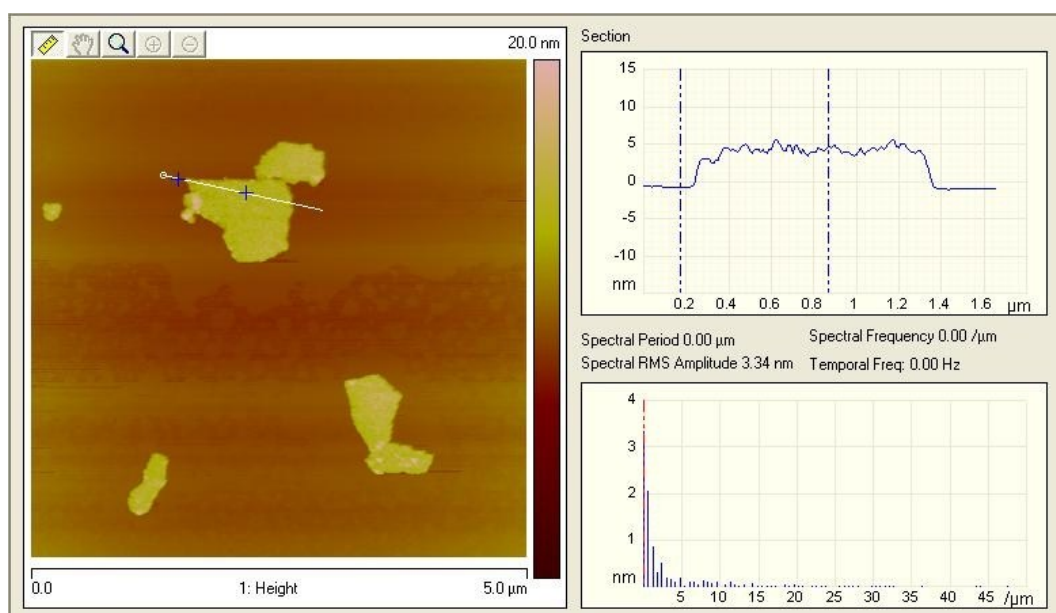

**Figure S4.** AMF image and height profile of SnS<sub>2</sub> NC/EDA-RGO hybrid nanosheets.

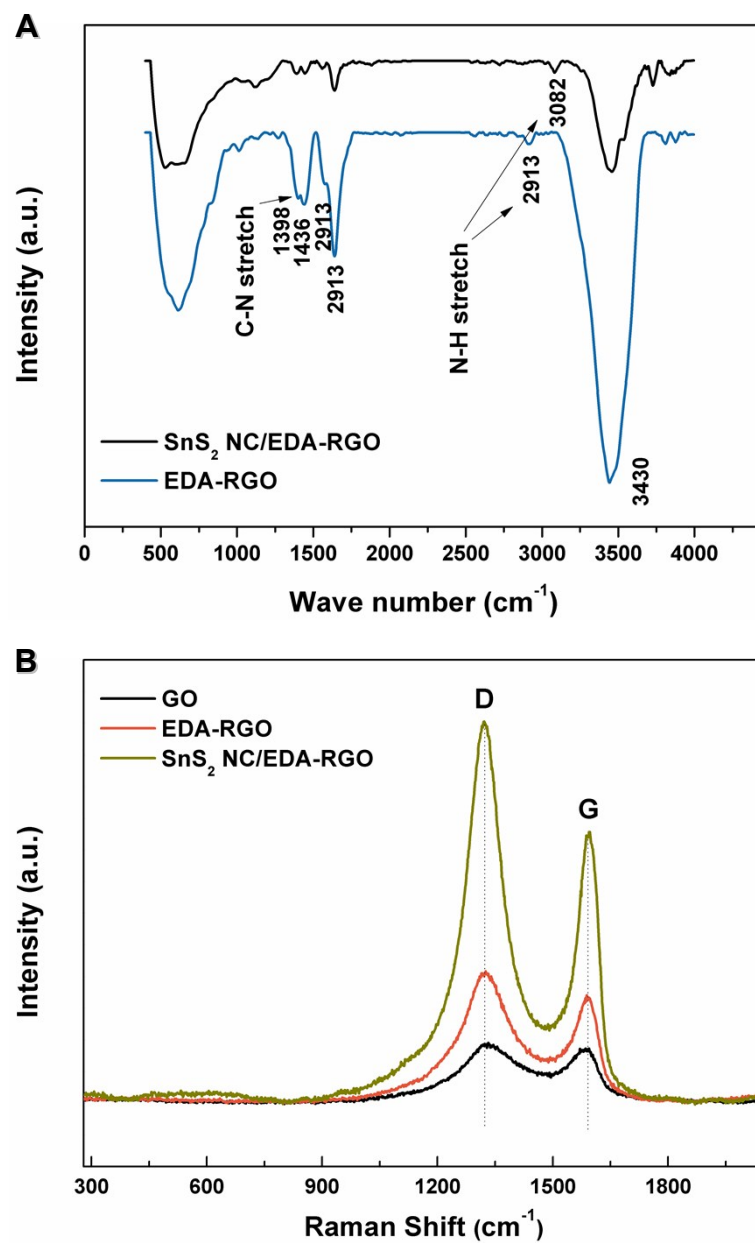

**Figure S5.** A) FT-IR spectra of EDA-RGO and SnS<sub>2</sub> NC/EDA-RGO hybrid nanosheets. B) Raman spectra of GO, EDA-RGO and SnS<sub>2</sub> NC/EDA-RGO hybrid nanosheets.

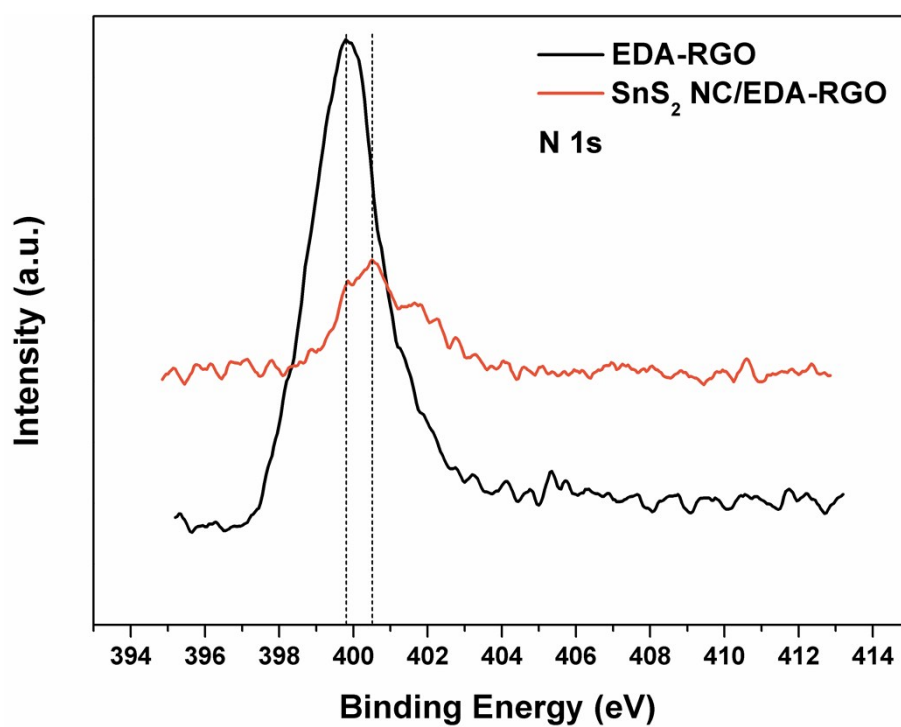

**Figure S6.** XPS spectra analysis. High-resolution N 1s spectra of EDA-RGO and SnS<sub>2</sub> NC/EDA-RGO hybrid nanosheets.

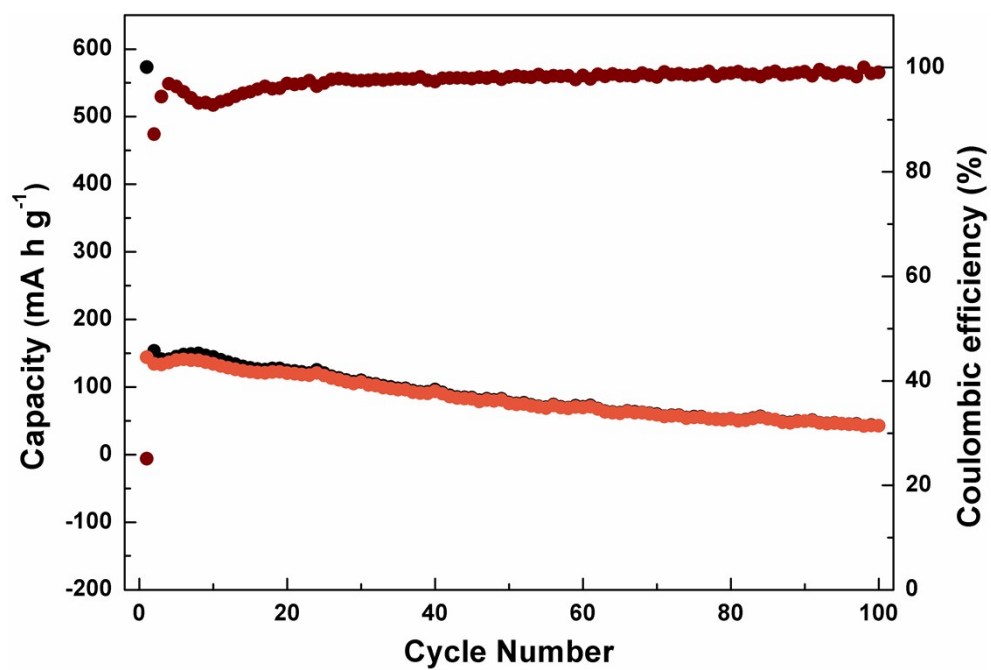

**Figure S7.** Cycling performance of pure SnS<sub>2</sub> nanoparticles at a current density of 200 mA g<sup>-1</sup> and the corresponding Coulombic efficiency.



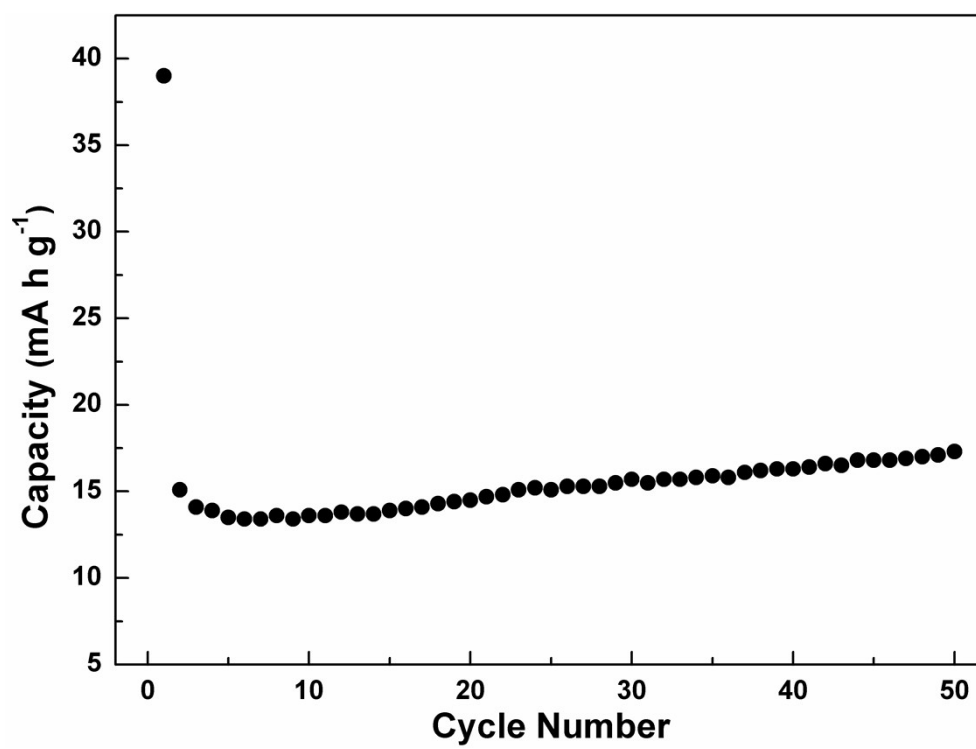

**Figure S8.** Cycling performance of the bare EDA-functionalized RGO electrode at a current density of 200 mA g<sup>-1</sup>.

**Table S1.** Comparison of electrochemical performance of SnS<sub>2</sub> NC/EDA-RGO hybrid nanosheets in this work with those of others reported in the literature.

| Sample                      | Current Density<br>[mA g <sup>-1</sup> ] | Cycle number | Final capacity<br>[mA h g <sup>-1</sup> ] | Capacity retention | Reference |
|-----------------------------|------------------------------------------|--------------|-------------------------------------------|--------------------|-----------|
| SnS <sub>2</sub> NC/EDA-RGO | 1000                                     | 400/1000     | 533/480                                   | 95%/85%            | This work |
| SnS <sub>2</sub> NC/RGO     | 910                                      | 400/1000     | 485/256                                   | 84%/44%            | This work |
| SnS <sub>2</sub> -RGO       | 1000                                     | 400          | 500                                       | 84%                | [15]      |
| SnS <sub>2</sub> /RGO       | 800                                      | 400/1000     | 417/286                                   | 89%/61%            | [3]       |
| SnS@Graphene                | 810                                      | 250          | 492                                       |                    | [14]      |
| GO-SnS <sub>2</sub> -300    | 500                                      | 150          | 450                                       |                    | [25]      |
| WS <sub>2</sub> @graphene   | 640                                      | 500          | 94                                        |                    | [12]      |
| MG-3                        | 320                                      | 300          | 227                                       |                    | [13]      |
| MoS <sub>2</sub> -carbon    | 1000                                     | 100          | 484                                       |                    | [17]      |
| MoS <sub>2</sub> /carbon    | 670                                      | 300          | 400                                       |                    | [18]      |

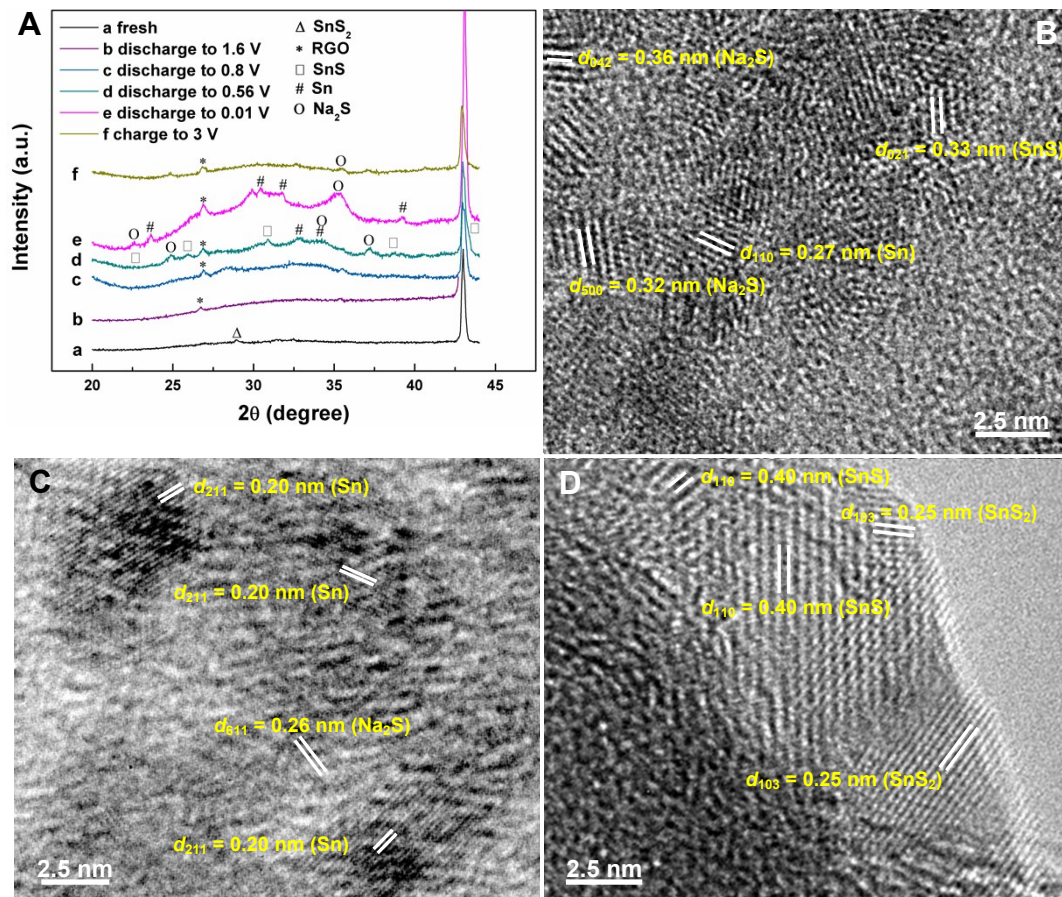

**Figure S9.** A) *Ex-situ* XRD patterns of  $\text{SnS}_2$  NC/EDA-RGO electrodes tested under different discharge and charge state. *Ex-situ* HRTEM images of  $\text{SnS}_2$  NC/EDA-RGO electrodes conducted after discharge to 0.56 V (B), after discharge to 0.01 V (C), after charge to 3.0 V (D).

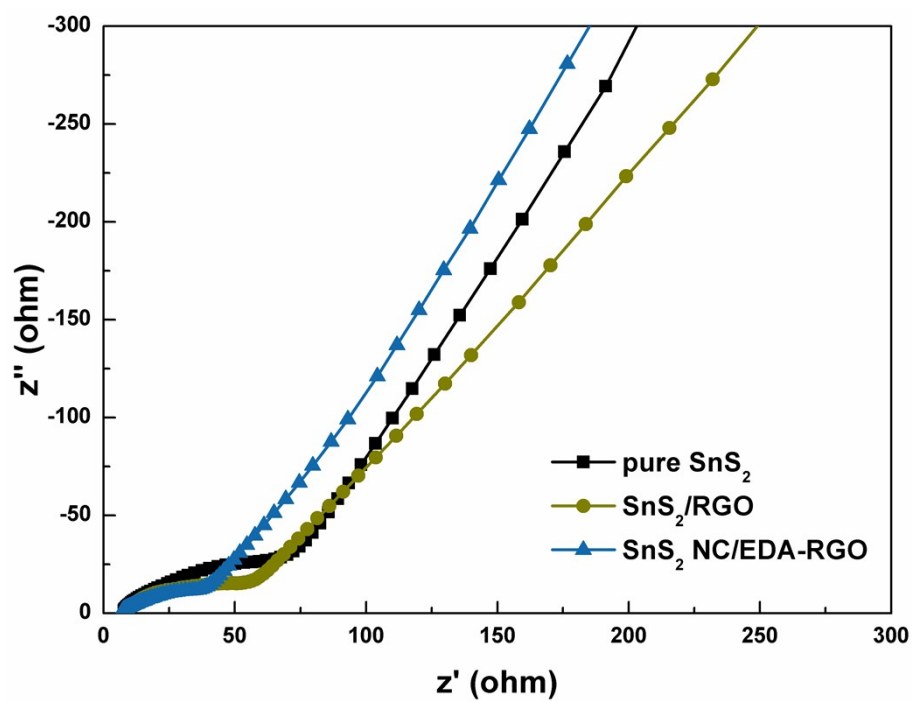

**Figure S10.** The electrochemical impedance spectra (EIS) of the pure  $\text{SnS}_2$ ,  $\text{SnS}_2/\text{RGO}$ , and  $\text{SnS}_2$  NC/EDA-RGO anodes after three cycles.

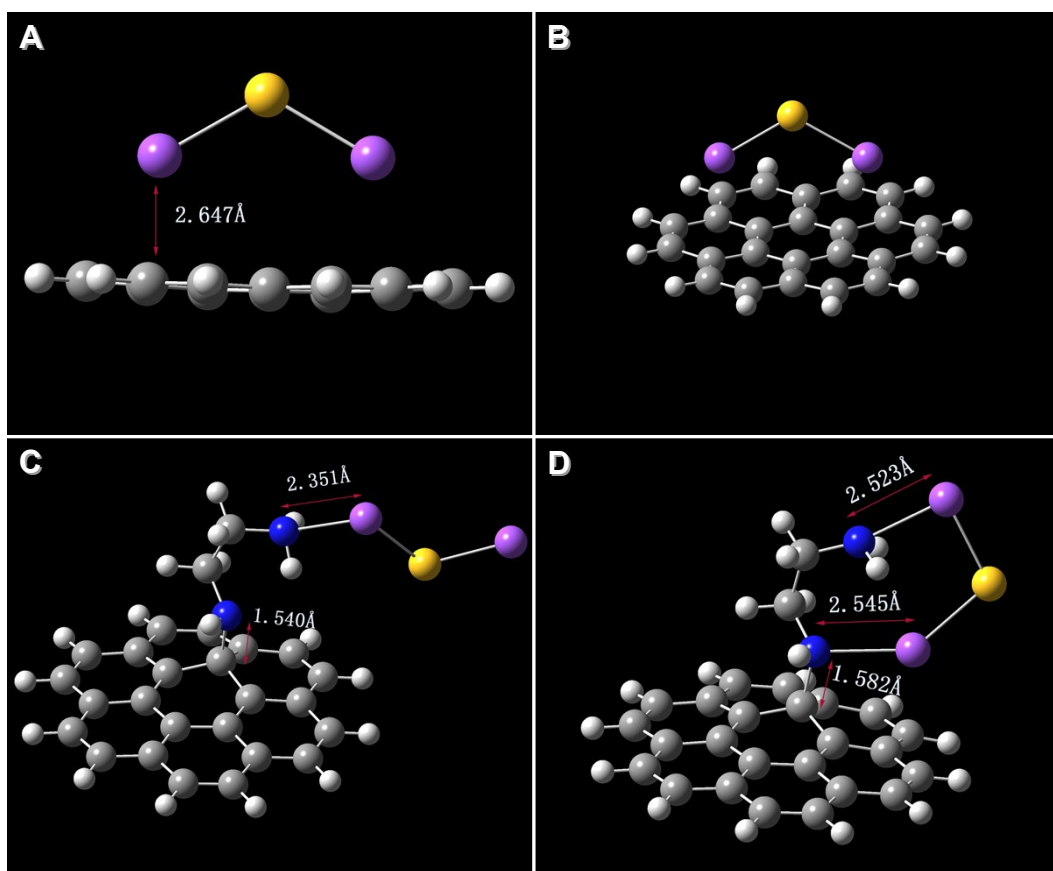

**Figure S11.** the models of VASP calculation, showing the interaction between  $\text{Na}_2\text{S}$  and pristine graphene (A,B), and EDA modified graphene (C,D). The carbon (C), sulphur (S), sodium (Na), hydrogen (H) and nitrogen (N) atoms are denoted as the gray, yellow, purple, white and blue spheres respectively.
